# Supplementary material for: MiR-33a is a therapeutic target in SPG4-related hereditary spastic paraplegia human neurons
Source: Oxford University Press journal article supplement (doi:10.1042/cs20180980), 2019-02-01
Supplement: cs-2018-0980_supp.pdf [file cs-2018-0980_supp.pdf]

## **MiR-33a is a therapeutic target in SPG4-related hereditary spastic paraplegia human neurons**

**Fumiko Nakazeki<sup>1†</sup>, Itaru Tsuge<sup>2,3†</sup>, Takahiro Horie<sup>1</sup>, Keiko Imamura<sup>2,4,5</sup>, Kayoko Tsukita<sup>2,4</sup>, Akitsu Hotta<sup>2</sup>, Osamu Baba<sup>1</sup>, Yasuhide Kuwabara<sup>1</sup>, Tomohiro Nishino<sup>1</sup>, Tetsushi Nakao<sup>1</sup>, Masataka Nishiga<sup>1</sup>, Hitoo Nishi<sup>1</sup>, Yasuhiro Nakashima<sup>1</sup>, Yuya Ide<sup>1</sup>, Satoshi Koyama<sup>1</sup>, Masahiro Kimura<sup>1</sup>, Shuhei Tsuji<sup>1</sup>, Motoko Naitoh<sup>3</sup>, Shigehiko Suzuki<sup>3</sup>, Yuishin Izumi<sup>6</sup>, Toshitaka Kawarai<sup>6</sup>, Ryuji Kaji<sup>6</sup>, Takeshi Kimura<sup>1</sup>, Haruhisa Inoue<sup>2,4,5\*</sup>, and Koh Ono<sup>1\*</sup>**

**1 Department of Cardiovascular Medicine, Graduate School of Medicine, Kyoto University, Japan.**

**2 Center for iPS Cell Research and Application (CiRA), Kyoto University, Japan.**

**3 Department of Plastic and Reconstructive Surgery, Graduate School of Medicine, Kyoto University, Kyoto 606-8507, Japan**

**4 iPSC-based Drug Discovery and Development Team, RIKEN BioResource Center (RIKEN BRC), Kyoto, Japan**

**5 Medical-risk Avoidance based on iPS Cells Team, RIKEN Center for Advanced Intelligence Project (RIKEN AIP), Kyoto, Japan**

**6 Department of Clinical Neuroscience, Institute of Biomedical Sciences, Tokushima University Graduate School, Tokushima 770-8503, Japan**

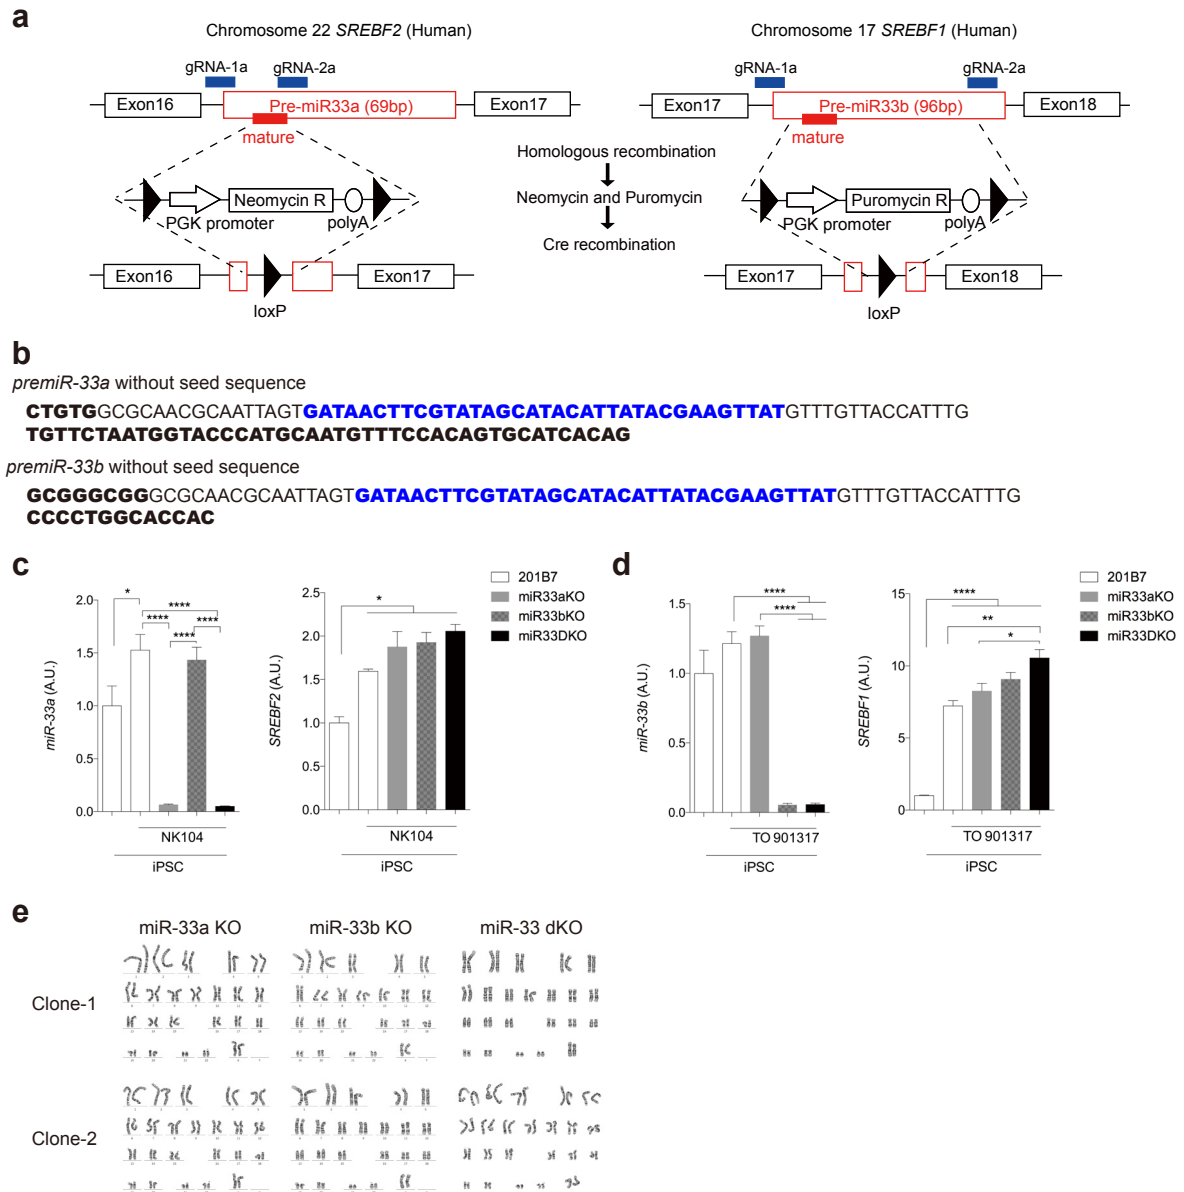

Supplementary Figure. 1

- (a) Schematic overview of human *SREBF2* and *SREBF1* locus with targeting strategy. The donor template was designed to have PGK-Neomycin and/or Puromycin selection cassette flanked by two loxP sites and homology arms. PGK promoter: phosphoglycerol kinase promoter, Neomycin R: neomycin resistance gene, Puromycin R: puromycin resistance gene, polyA: polyadenylation sequence.
- (b) DNA sequencing confirmed the deletions and insertions generated by CRISPR-Cas9 technology. loxP sequenced are highlighted by blue.
- (c) Expression levels of mature miR-33a and the host gene (*SREBF2*) with treatment. n=3 in each clone, two clones per knockout line. \* $p < 0.05$ , \*\*\*\* $p < 0.0001$  by one-way ANOVA.
- (d) Expression levels of mature miR-33b and the host gene (*SREBF1*) with treatment. n=3 in each clone, two clones per knockout line.
- (e) Karyotype analysis in miR-33 KO iPSCs.

**a**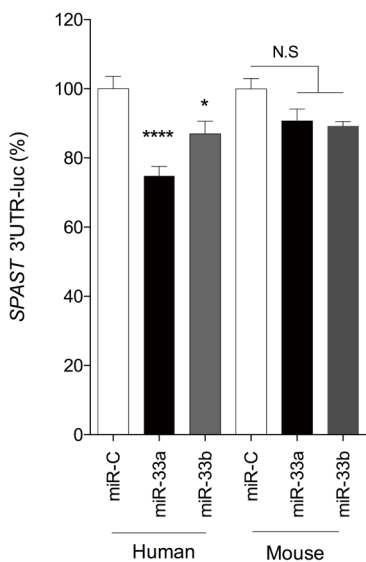**b**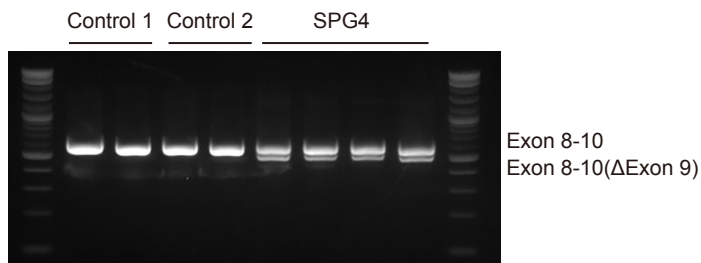**c**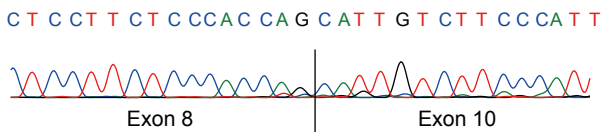**d**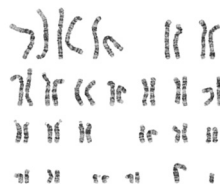

Supplementary Figure. 2

- (a) Luciferase reporter activity of human and mouse *SPAST* gene 3' -UTR constructs in HEK293T cells overexpressing miR-control (miR-C) and miR-33. n=4 each, \*P<0.05, \*\*\*\*P<0.0001 by unpaired t-test.
- (b) RT-PCR analysis of *SPAST* in SPG4-iPSCs. Sense primer was designed in exon 8, and antisense primer was designed in exon 10 of *SPAST*.
- (c) Sequencing of abnormal band (bottom band) in SPG4-iPSCs, indicating the skipped exon 9.
- (d) Karyotype analysis in SPG4-iPSCs.

**a**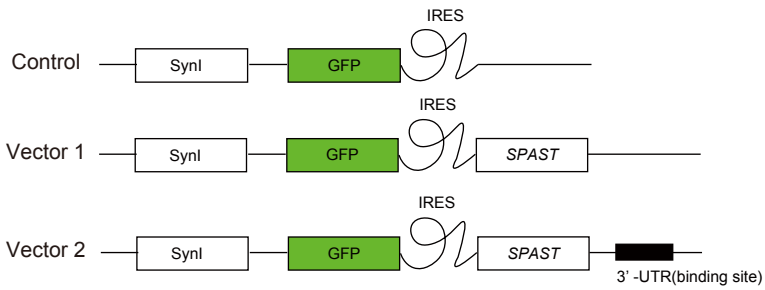**b**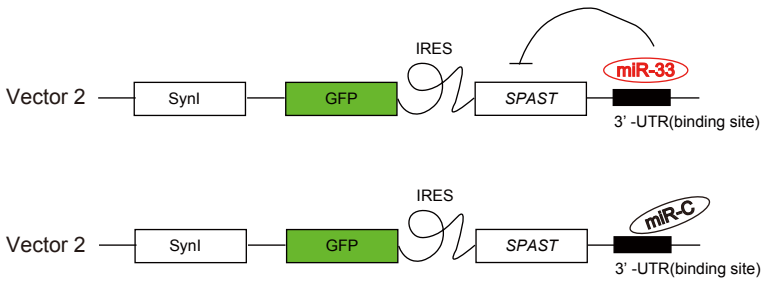

Supplementary Figure. 3

**(a)** Schematic map showing the lentivirus vector.**(b)** Schematic overview of miR-33 mediated translational repression.

**a**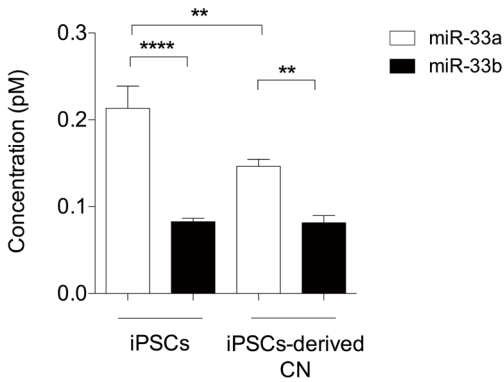**b**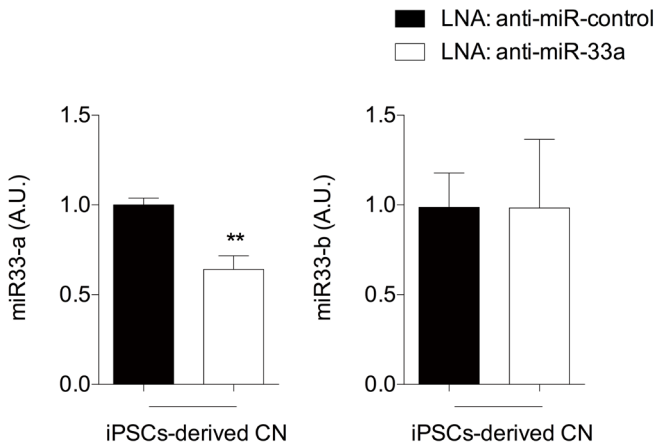**c**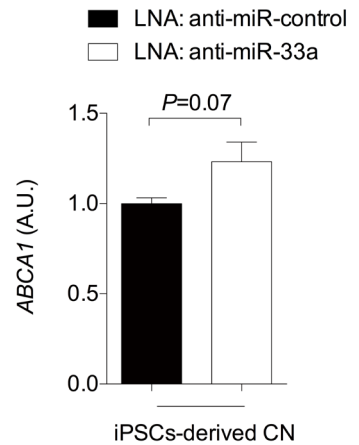

Supplementary Figure. 4

(a) Absolutely levels of miR-33a and miR-33b in both an undifferentiated state and neural differentiation. n=3~4 in each clone. \*\*P<0.01, \*\*\*\*P<0.0001 by unpaired t-test.

(b) Expression levels of miR-33a/b with LNA treatment in iPSC-derived cortical neurons. n=4~5 each, \*\*P<0.01 by unpaired t-test.

(c) Expression levels of *ABCA1* with LNA treatment in iPSC-derived cortical neurons. n=4~5 each.

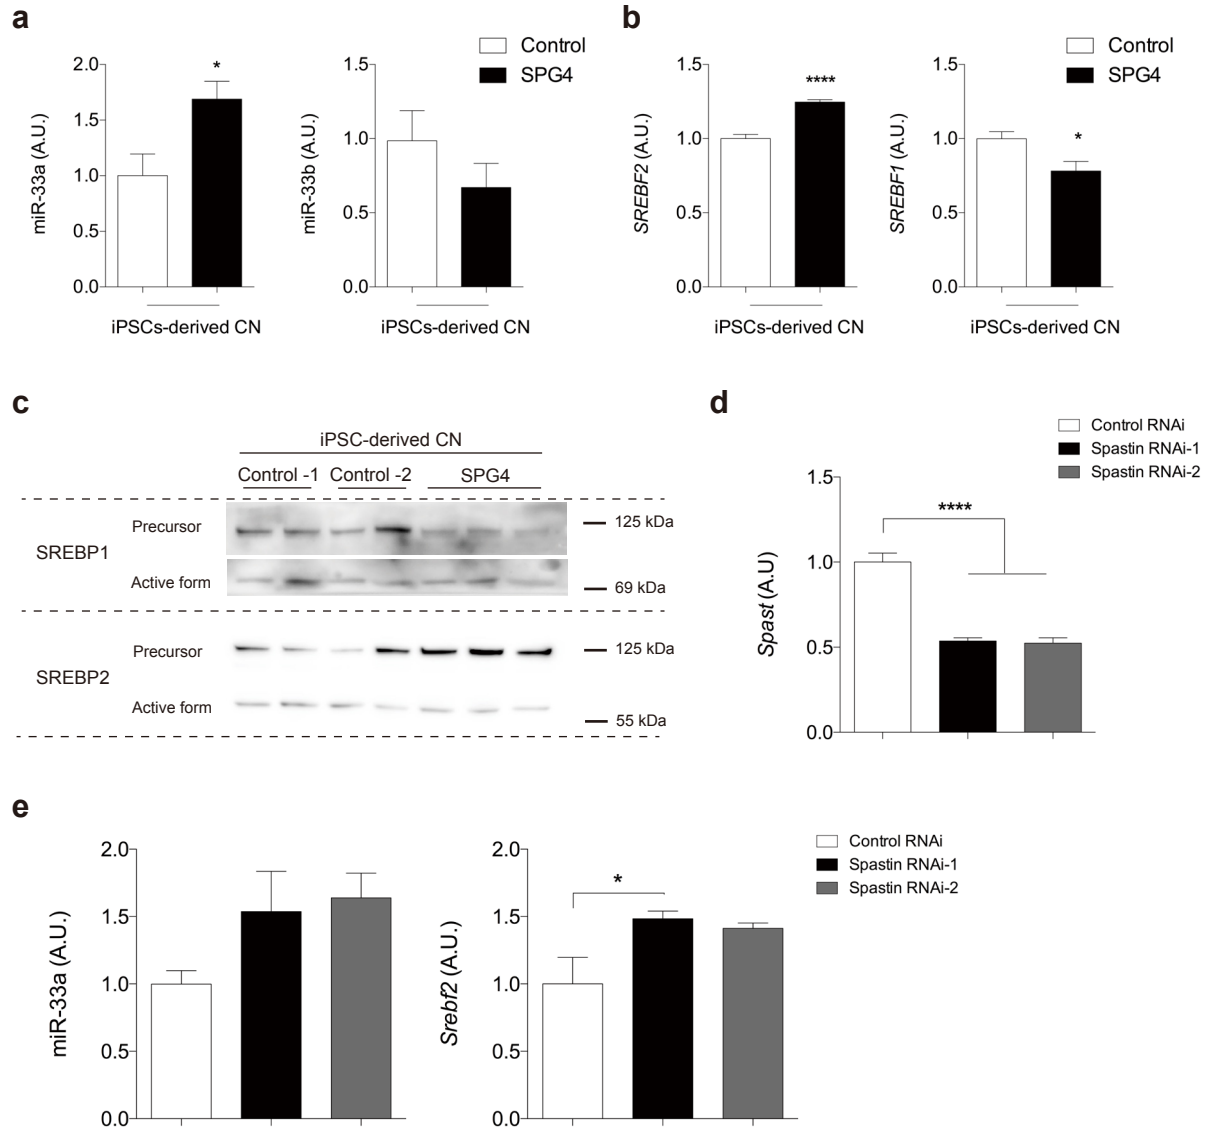

Supplementary Figure. 5

(a) Expression levels of miR-33 in SPG4-derived cortical neurons. n=4-5 each, \*P<0.05 by unpaired t-test.

(b) Expression levels of *SREBF2* and *SREBF1* in SPG4-derived cortical neurons. n=4-5 each, \*P<0.05, \*\*\*\*P<0.0001 by unpaired t-test.

(c) Protein levels of SREBP1 and SREBP2 in SPG4-derived cortical neurons. Results obtained from the different part of the same membrane of Figure 3b.

(d) RT-PCR analysis conforming knockdown of Spastin in Neuro 2a cells. n=5 each, \*\*\*\*P<0.0001 by one-way ANOVA.

(e) Expression levels of miR-33a and *Srebf2* in two spastin RNAi Neuro 2a. n=5 each, \*P<0.05 one-way ANOVA.

**Table S1. Sequences for the gene targeting strategy**

Selected sequences for gene targeting of CRISPR-Cas9n are shown.

| Gene targeting sequence |                          |
|-------------------------|--------------------------|
| miR-33a KO gRNA-1a      | GCTGCCCCGCCAGGAGGTATGCGG |
| miR-33a KO gRNA-2a      | TGTAGTTGCATTGCATGTTCTGG  |
| miR-33b KO gRNA-1b      | TGCAACAGCAATGCACCGCG     |
| miR-33b KO gRNA-2b      | TCGGCAGTGCAGCCCGGAGC     |

**Table S2. Primer sequences**

Gene-specific oligonucleotide primer sequences used in this study

| Gene          | Species | Forward                 | Reverse                 |
|---------------|---------|-------------------------|-------------------------|
| <i>SREBF1</i> | Human   | AACAGTCCCCTGGTCGTAGAT   | TGTTGCAGAAAGCGAATGTAGT  |
| <i>SREBF2</i> | Human   | AGGAGAACATGGTGCTGA      | TAAAGGAGAGGCACAGGA      |
| <i>SPAST</i>  | Human   | AGCTGGTCAAGACTTGGCAA    | AGGTTGCATTCGATTCTGCA    |
| <i>ABCA1</i>  | Human   | GTCCTCTTTCCCGCATTATCTGG | AGTTCCTGGAAGGTCTTGTTCAC |
| <i>18S</i>    | Human   | AGAAACGGCTACCACATCCA    | CCCTCCAATGGATCCTCGTT    |
| <i>Sreb2</i>  | Mouse   | GTGGAGCAGTCTCAACGTCA    | TGGTAGGTCTCACCCAGGAG    |
| <i>Spast</i>  | Mouse   | CGGGCCAAGGTGAACAGTAT    | GATGTCCATTGCGGCATGTC    |
| <i>18S</i>    | Mouse   | CGCGGTTCTATTTTGTGGT     | AGTCGGCATCGTTTATGGTC    |
